# Supplementary material for: Effects of carbon nanotubes on intercellular communication and involvement of IL-1 genes
Source: PubMed Central journal article supplement (PMC4882305; doi:10.1007/s12079-016-0323-0), 2016-04-21
Supplement: 12079_2016_323_MOESM1_ESM.pdf [file 12079_2016_323_MOESM1_ESM.pdf]

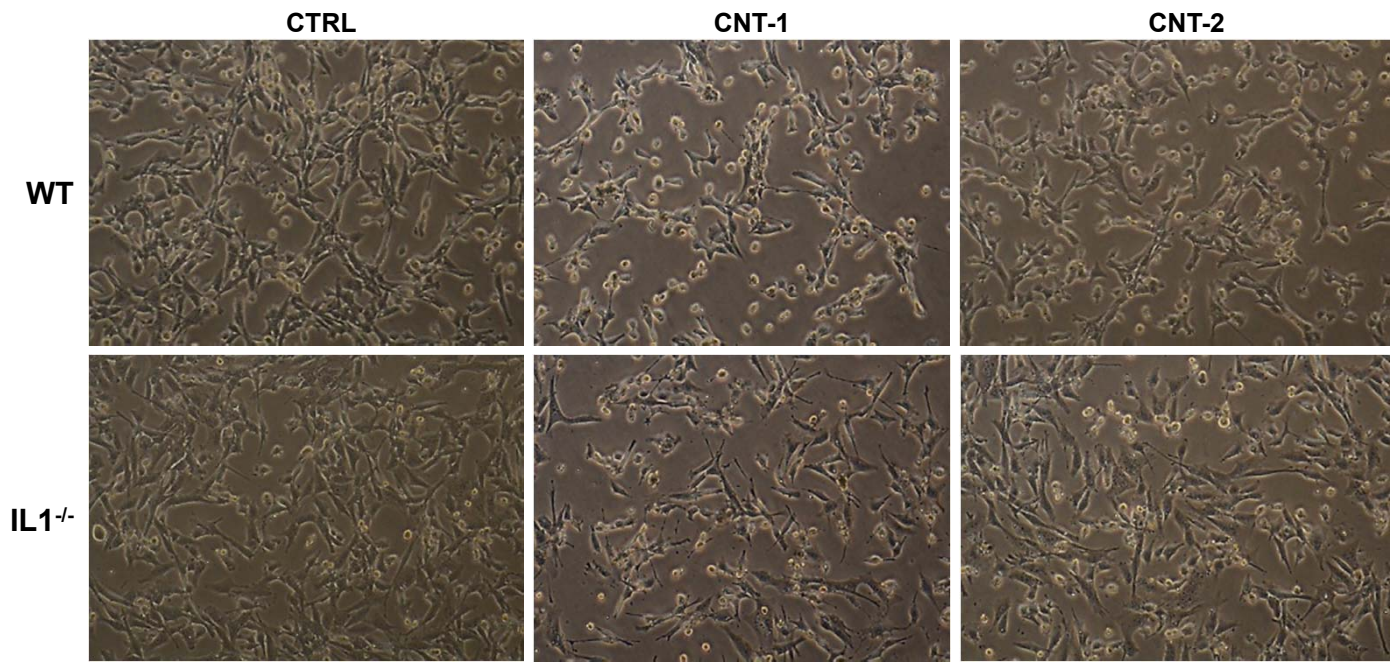

Supplementary Figure 1
